# Supplementary material
Source: MDPI journal article supplement (https://www.mdpi.com/2073-4433/14/10/1491)
Supplement: s1 [file s1]

## Supplementary Material

### Potential Health Impacts from a Wildfire Smoke Plume over Region Jämtland Härjedalen, Sweden

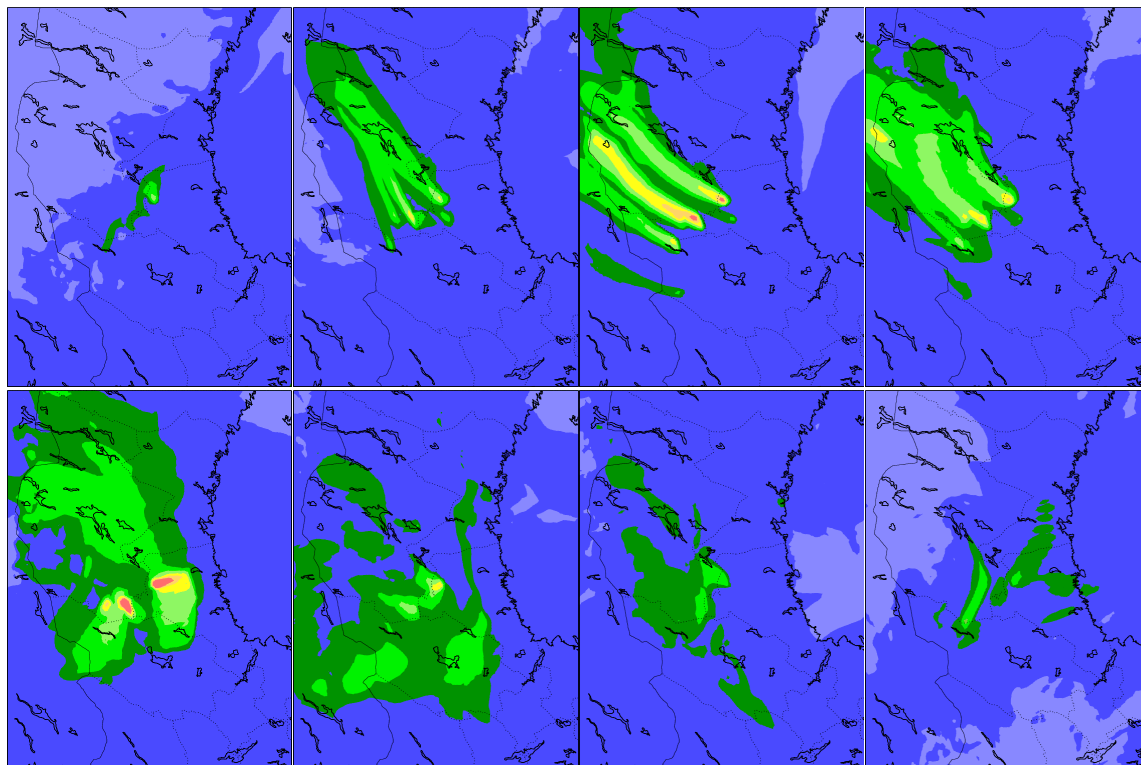

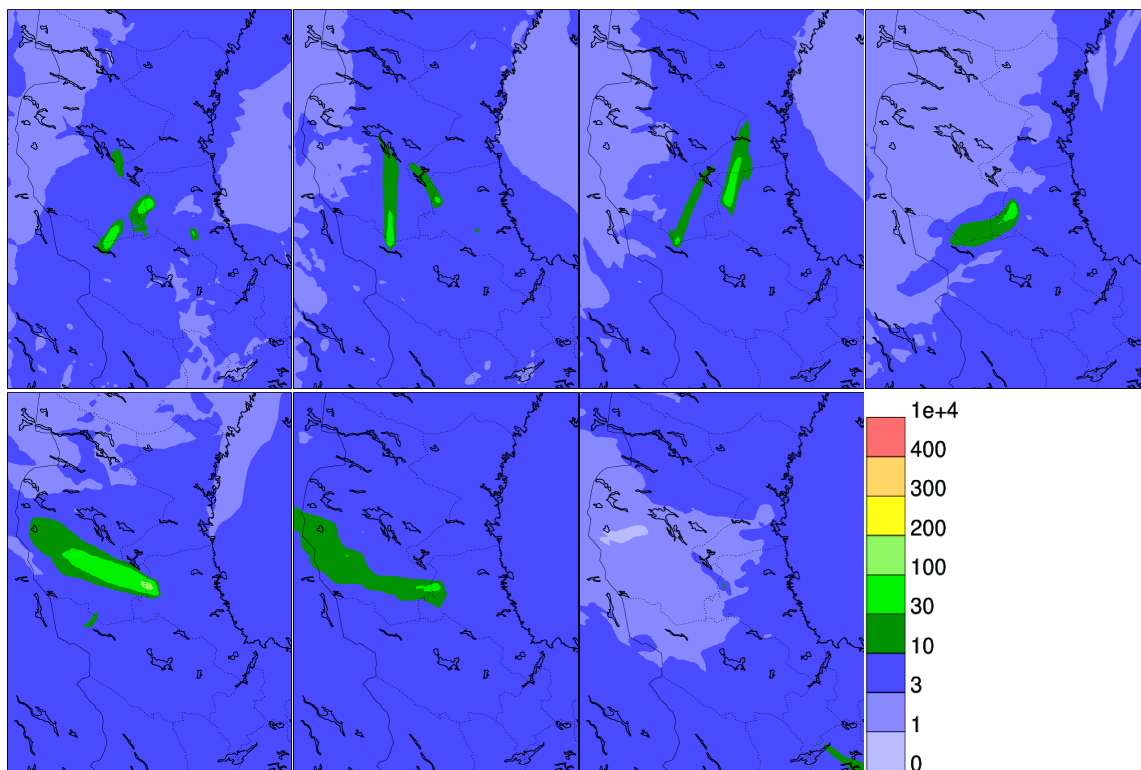

**Figure S1.** Simulated diurnal maximum concentration of PM<sub>2.5</sub> in the region affected by forest fires in central Sweden 2018 for 15–29 July 2018. Unit:  $\mu\text{g m}^{-3}$ .

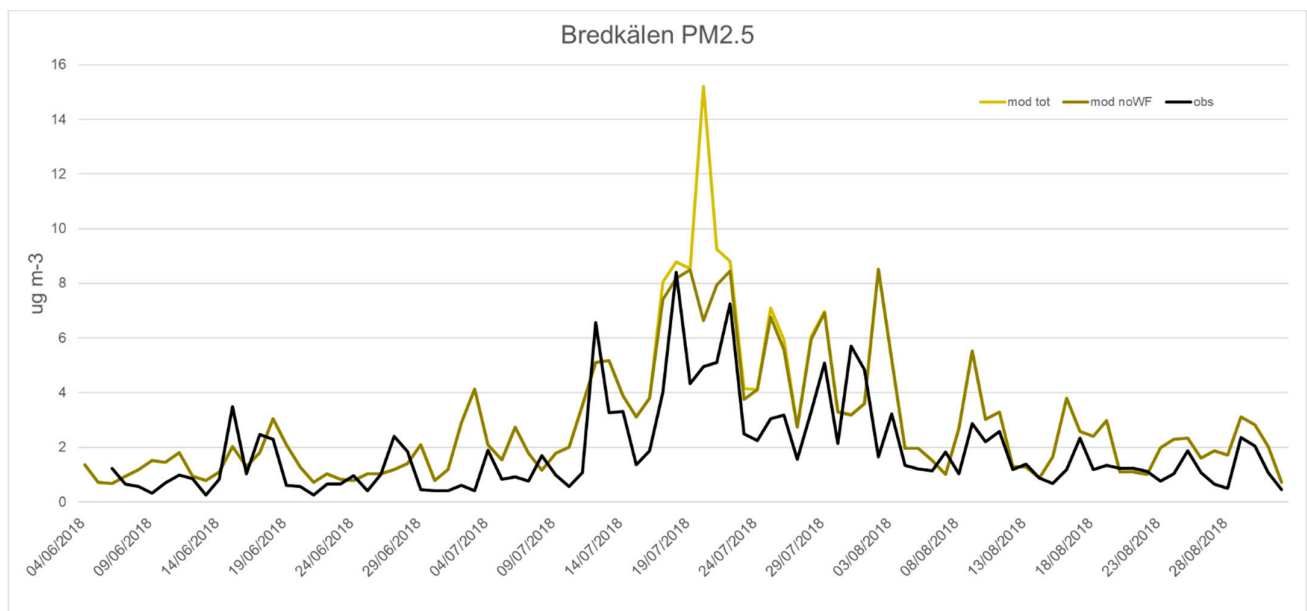

**Figure S2.** Daily mean concentration of PM2.5 at Bredkälén. Modelled total PM2.5 (mod tot), modelled PM2.5 excluding wild fire contribution (mod noWF) and observed (obs) PM2.5. Unit:  $\mu\text{g m}^{-3}$ .

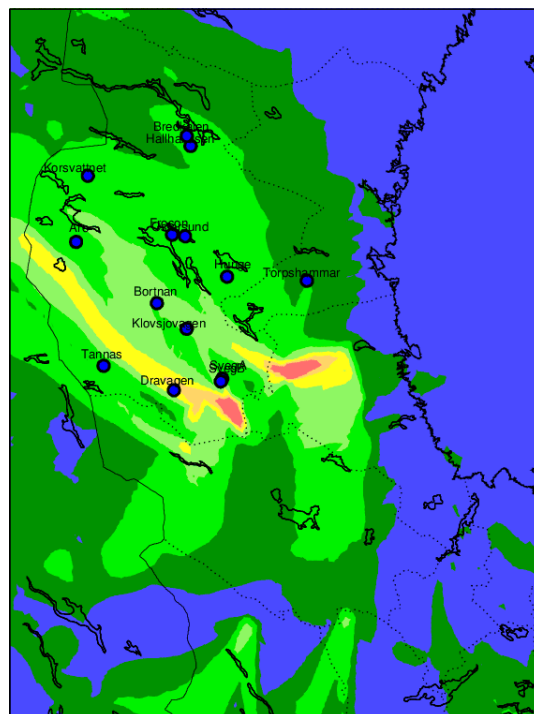

**Figure S3.** Station locations and names for meteorological stations with visibility observations.

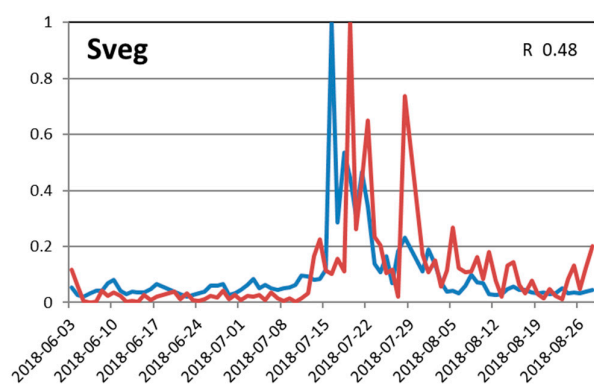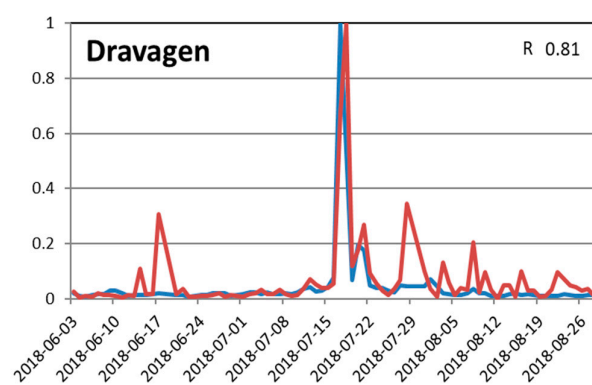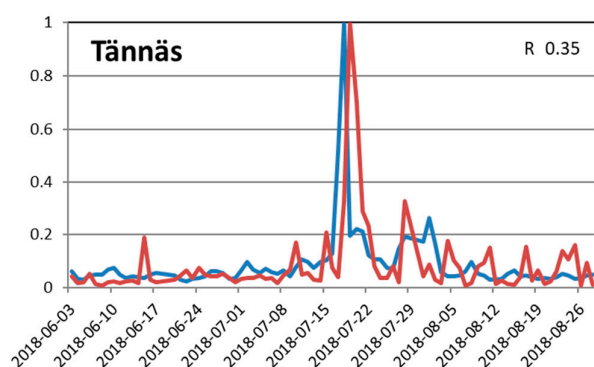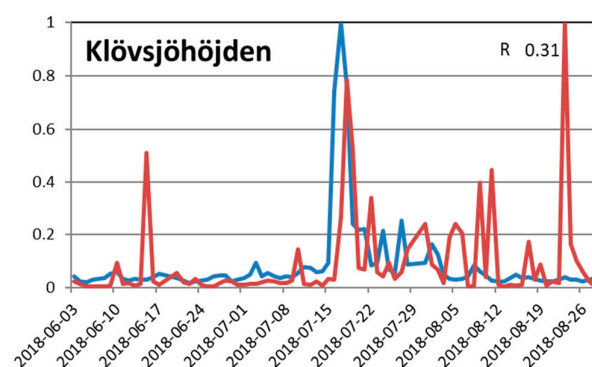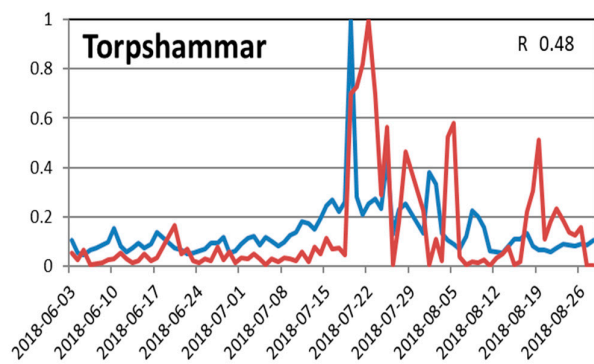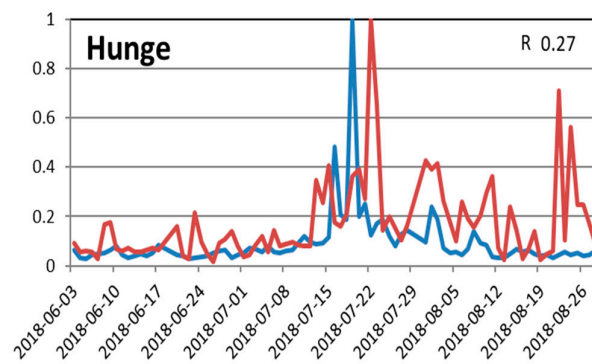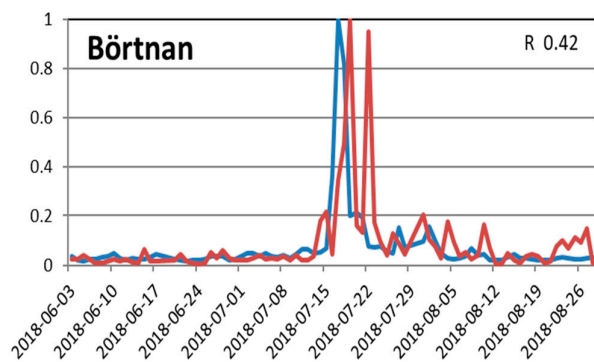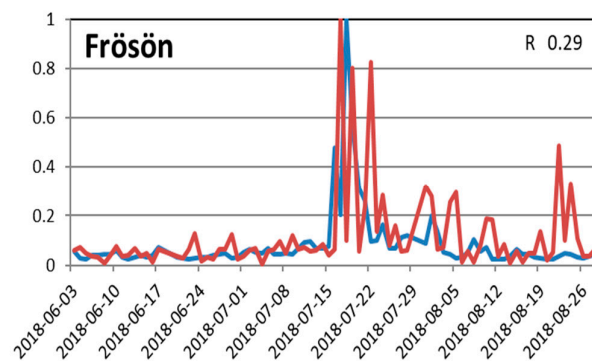

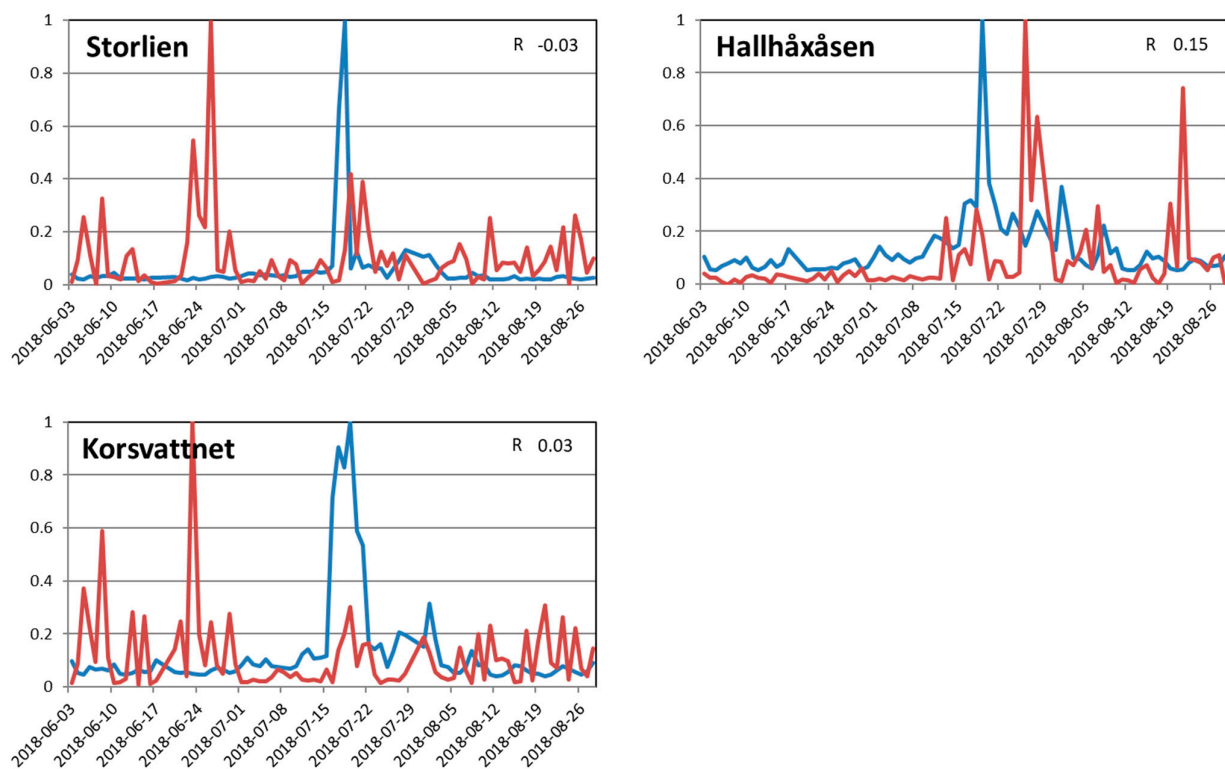

**Figure S4.** Model simulated diurnal average PM<sub>2.5</sub> (blue) and observed diurnal average inverse of visibility (1/m, red) at meteorological stations operated by the Swedish Meteorological and Hydrological Institute in the region hit by fires in 2018. For station locations see Figure S3. Both PM<sub>2.5</sub> and inverse of visibility were normalized to one using the maximum value in each time series. Correlations (R) are provided in the top right corner for each station.
